# Supplementary material for: DNA-Directed Assembly of Carbon Nanotube–Protein Hybrids
Source: MDPI journal article supplement (doi:10.3390/biom11070955), 2021-06-29
Supplement: s1 [file s1]

# DNA-directed assembly of Carbon Nanotube-Protein hybrids

Mark Freeley,<sup>1</sup> Rebecca E.A. Gwyther,<sup>2</sup> D. Dafydd Jones,<sup>2\*</sup> and Matteo Palma.<sup>1\*</sup>

**1** Department of Chemistry, Queen Mary University of London, , London, E1 4NS, United Kingdom;

**2** Molecular Biosciences Division, School of Biosciences, Cardiff University, Cardiff, CF10 3AX, Wales, United Kingdom;

## Supplementary Information

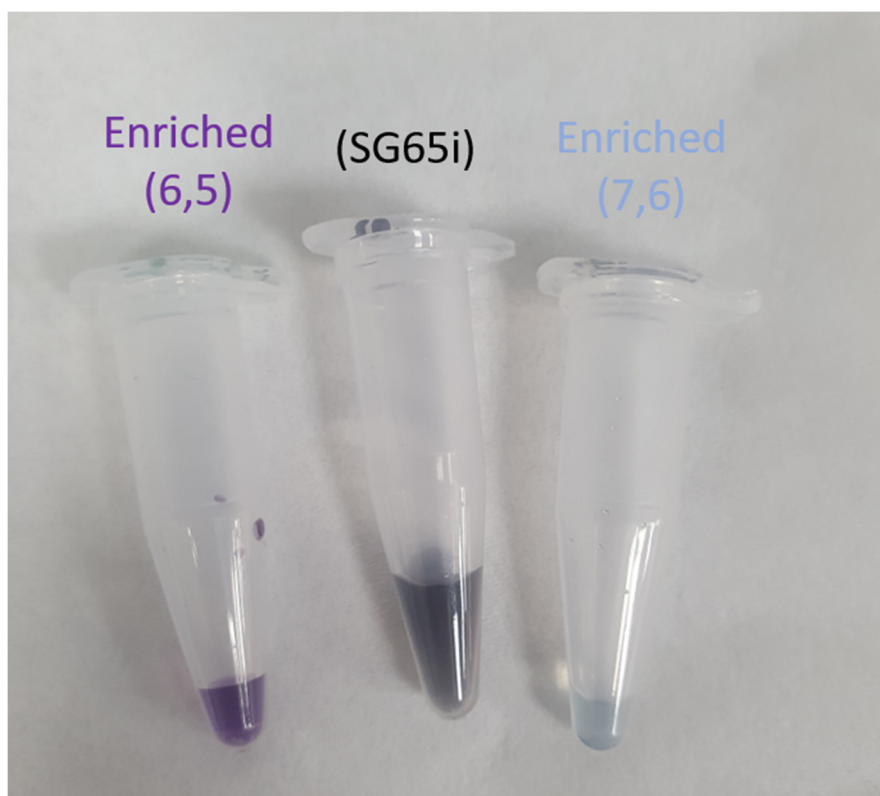

Figure S1. Image of the SWCNT species used.

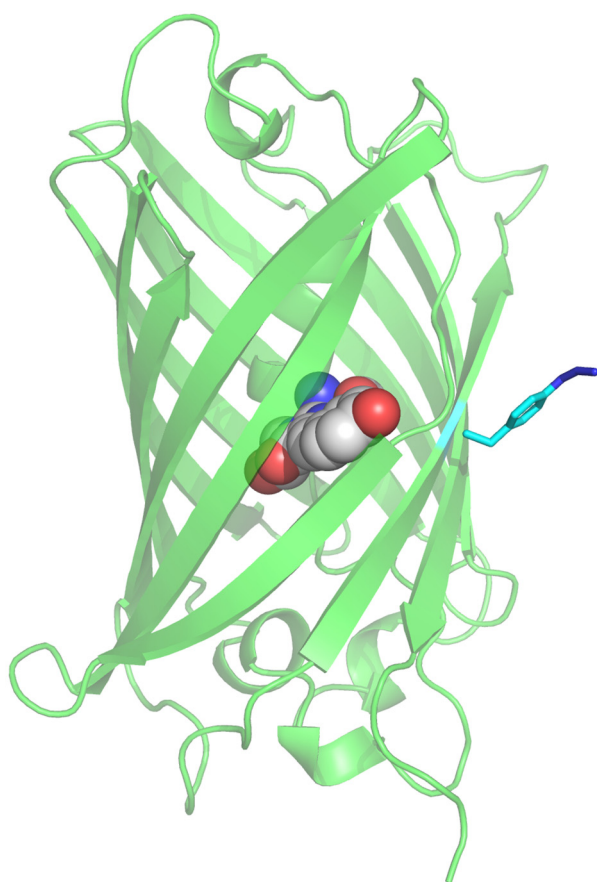

Figure S2. Representation of GFP<sup>204AzF</sup>. The chromophore is shown as spheres and 204AzF is shown in sticks and coloured cyan.

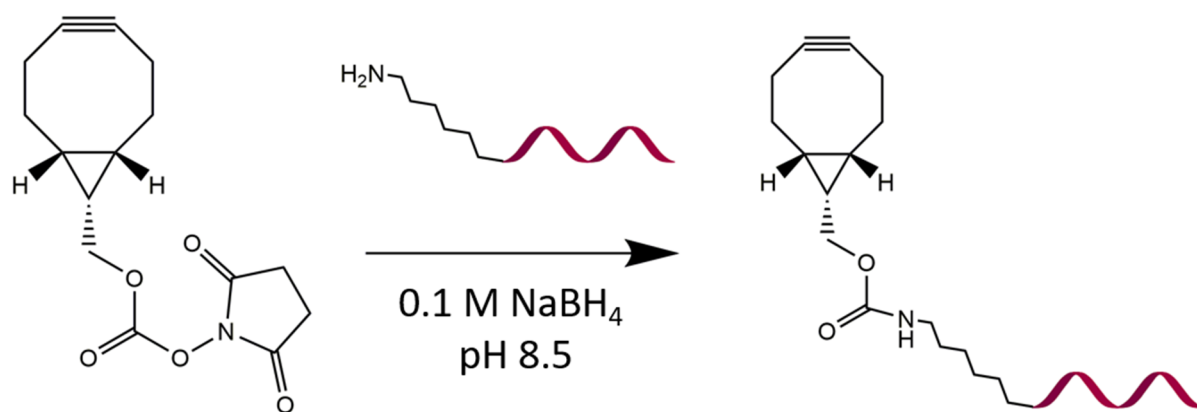

Figure S3. Scheme for the functionalisation of amine-modified oligonucleotide with BCN-NHS Ester.

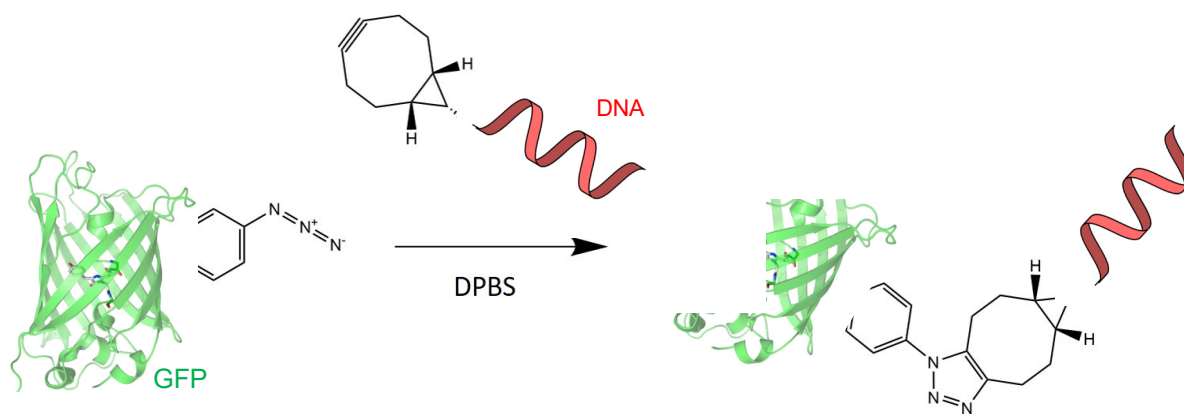

Figure S4. Scheme for the conjugation of BCN-DNA to azido-GFP.

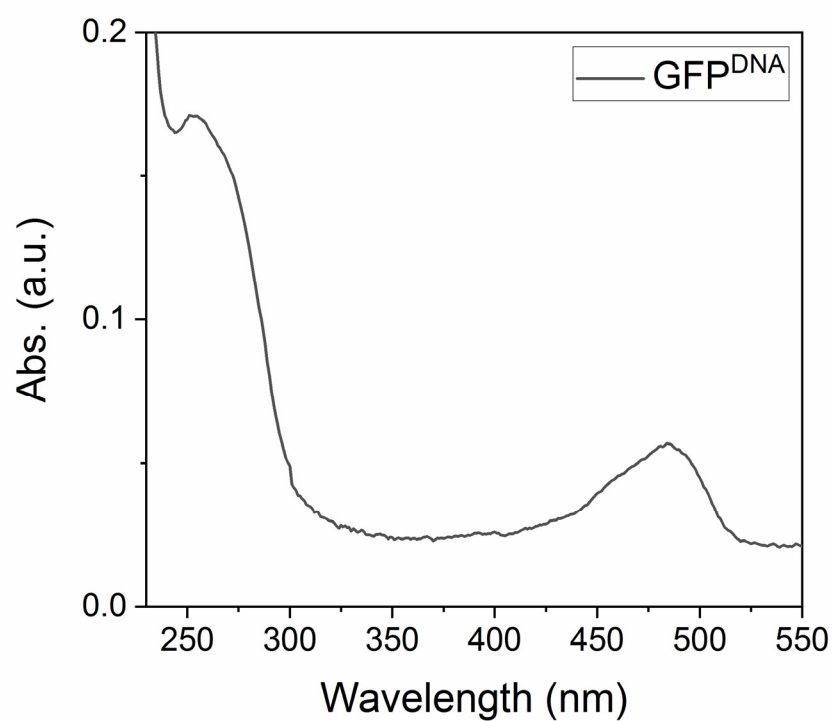

Figure S5. UV-vis spectrum of GFP-DNA conjugate.

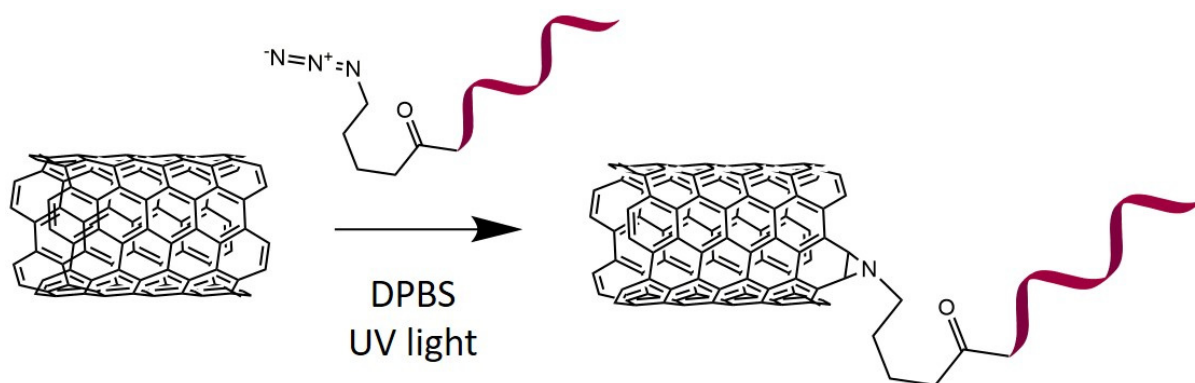

Figure S6. Scheme for the functionalisation of CNTs with azide-DNA via a UV-initiated reaction.

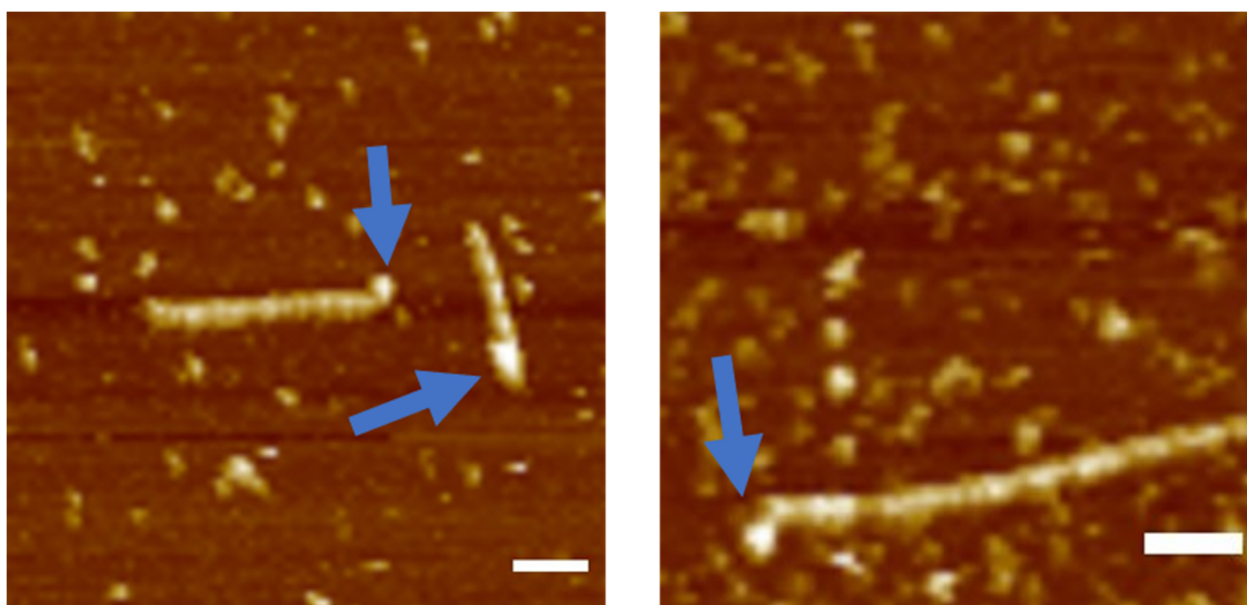

Figure S7. Additional AFM images of SWCNT-protein conjugates. Scale bar = 100 nm

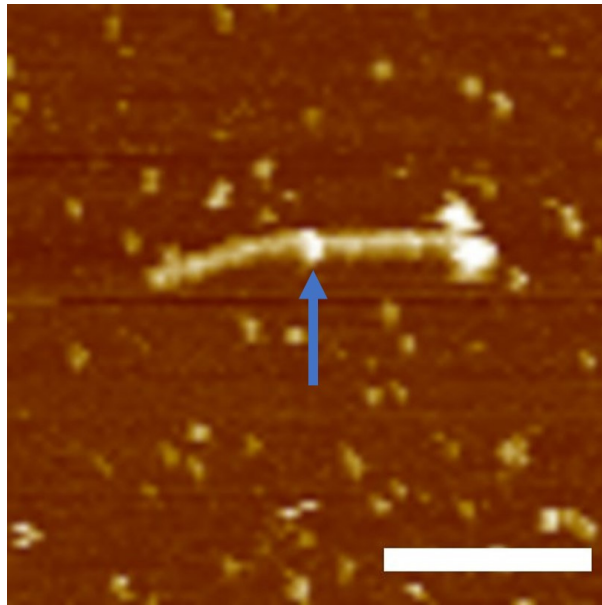

Figure S8. AFM image of protein attached to sidewall of SWCNT. Scale bar = 100 nm.

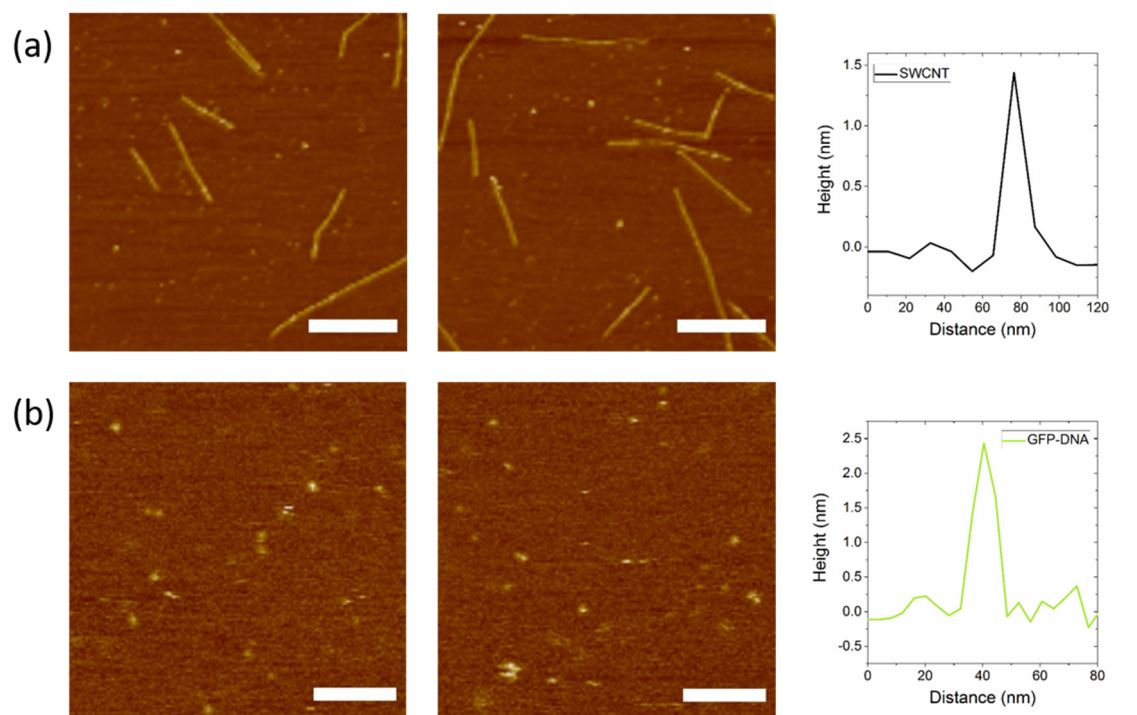

Figure S9. Fluid-mode AFM images of (a) unfunctionalized SWCNTs (scale bar = 250 nm) and (b) GFP-DNA (scale bar = 100 nm) with representative height profiles of each.

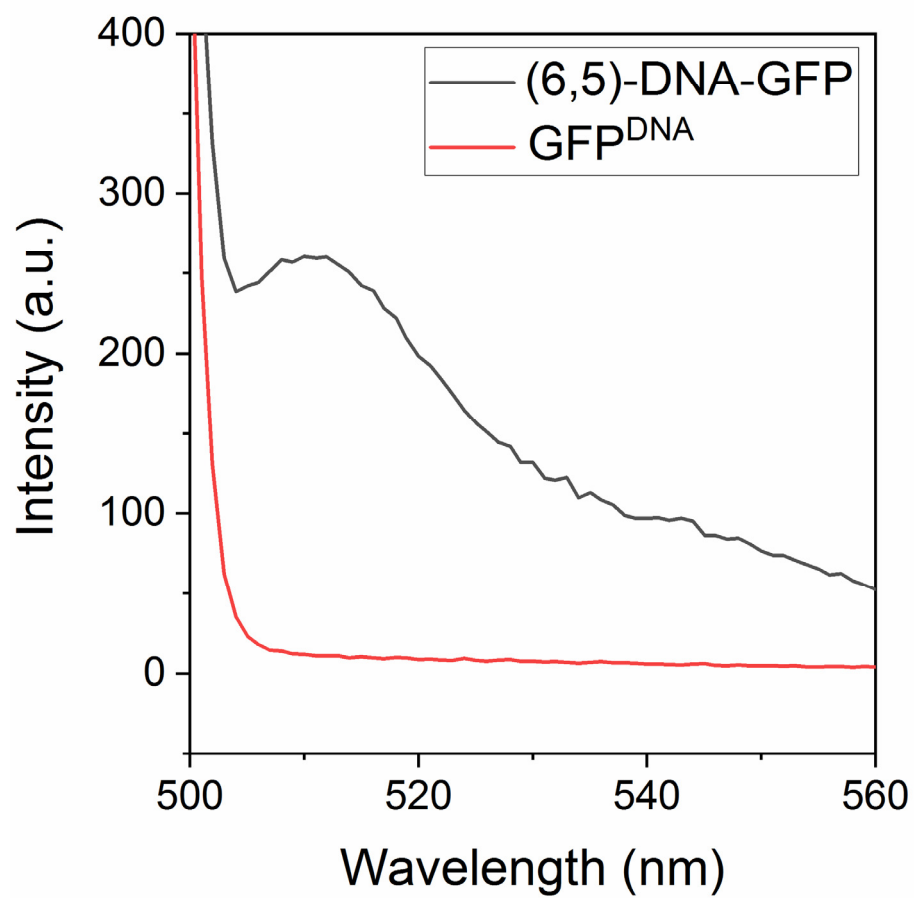

Figure S10. Comparison of the in-solution emission of SWCNT-GFP hybrids assembled with the DNA-functionalized (6,5) variant (black line) against GFP alone (red line), as measured by fluorescence spectroscopy.

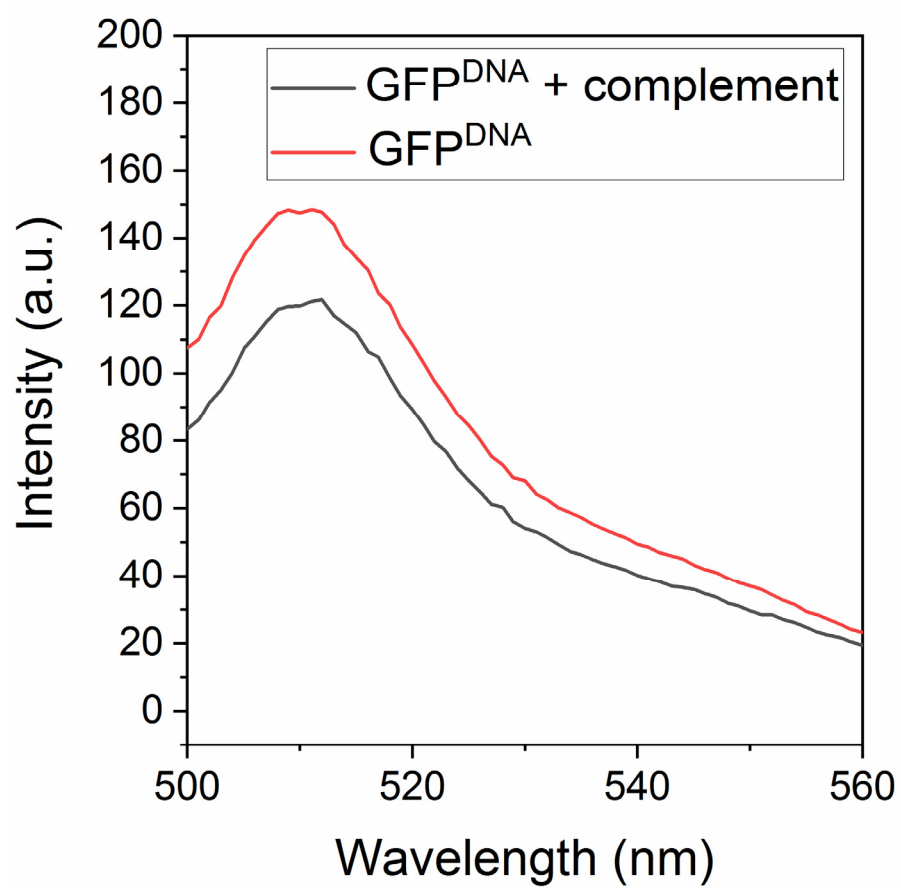

Figure S11. Fluorescence spectrum of GFP-DNA alone (50 nM) and with complementary DNA (500 nM).
